# Supplementary material for: Enhancing epitope of PEDV spike protein
Source: PubMed Central journal article supplement (PMC9355140; doi:10.3389/fmicb.2022.933249), 2022-07-22
Supplement: Data_Sheet_1.pdf [file Data_Sheet_1.pdf]

## *Supplementary Materials*

**Supplementary Table S1** | Oligonucleotide primers used in qRT-PCR (Cho et al., 2012).

| Gene                                                                               | Primer name | Sequence (5'-3')      |
|------------------------------------------------------------------------------------|-------------|-----------------------|
| PEDV <i>N</i> (nucleocapsid gene)                                                  | PEDV N F'   | CAAGCACTTCTGTTTCCCCGG |
|                                                                                    | PEDV N R'   | ATTGTCACCATAAGCAGCCA  |
| <i>RPLPO</i> (endogenous control; ribosomal protein lateral stalk subunit P0 gene) | RPLPO F'    | AGATGCAGCAGATCCGCAT   |
|                                                                                    | RPLPO R'    | GGATGGCCTTGCGCA       |

### Reference

Cho, W.K., Kim, H., Choi, Y.J., Yim, N.H., Yang, H.J., and Ma, J.Y. (2012). *Epimedium koreanum* Nakai water extract exhibits antiviral activity against porcine epidemic diarrhea virus *in vitro* and *in vivo*. *Evid. Based Complement. Alternat. Med.* 2012:985151. doi: 10.1155/2012/985151

**Supplementary Table S2** | Oligonucleotide primers used in this study for production of truncated recombinant S1 polypeptides of PEDV spike protein.

| Gene          | Primer name | Sequence (5'-3')                                   |
|---------------|-------------|----------------------------------------------------|
| <i>SI-0</i>   | S1-0 F'     | GCGGATCCGATGAARTCYTTAAMYTACTTCTGG                  |
|               | S1-0 R'     | GGGCTCGAGTGAACCGCCTCCACCAACATTAAGCATGTAGTAAGTGGG   |
| <i>SI-A</i>   | S1-A F'     | GCGGATCCGACTAGTGCTGGTGAGGATG                       |
|               | S1-A R'     | GGGCTCGAGTGAACCGCCTCCACCATTAAATGATGGCAAAGTAACAAAAG |
| <i>SI-BCD</i> | S1-BCD F'   | GCGGATCCGGATCATTCTTTTGTAAATATTACTGTCTCTG           |
|               | S1-BCD R'   | GGGCTCGAGTGAACCGCCTCCACCAGTATTGCTAAACGTGGAGC       |
